# Supplementary material for: Characterization and Molecular Determinants for β-Lactam Specificity of the Multidrug Efflux Pump AcrD from Salmonella typhimurium
Source: MDPI journal article supplement (doi:10.3390/antibiotics10121494), 2021-12-06
Supplement: s1 [file s1]

**Characterization and molecular determinants for  $\beta$ -lactam  
specificity of the multidrug efflux pump AcrD from *Salmonella*  
*typhimurium***

**Jenifer Cuesta Bernal<sup>1</sup>, Jasmin El-Delik<sup>1</sup>, Stephan Göttig<sup>2</sup>, Klaas M. Pos<sup>1\*</sup>**

<sup>1</sup>Institute of Biochemistry, Goethe-University Frankfurt, Max-von-Laue-Str. 9, D-60438 Frankfurt am Main, Germany.

<sup>2</sup>Institute of Medical Microbiology and Infection Control, Hospital of the Goethe University, Paul-Ehrlich-Straße 40, D-60596 Frankfurt am Main, Germany.

\*Corresponding author

**Supplementary Materials and Methods**

### ***In silico* selection of RND multidrug efflux pump for pre-crystallization screening**

A total of eight genes encoding for secondary transporters classified within the RND HAE-1 family were annotated in the genomes of *Campylobacter jejuni* (*C. jejuni*) and *Salmonella enterica* serovar Typhimurium (*S. typhimurium*) (<http://www.tcdb.org/>, <http://www.membranetransport.org/> and <http://www.xbase.ac.uk/genome>). Nucleotide and primary sequences of corresponding proteins were retrieved from NCBI <https://www.ncbi.nlm.nih.gov/> (Table S3).

### **PCR**

RND target genes were amplified from *Campylobacter jejuni* or *Salmonella enterica* serovar Typhimurium LT2 (ATCC) genomic DNA (100 ng), using Buffer HF (ThermoFischer) with 200  $\mu$ M dNTPs, 0.5  $\mu$ M forward and reverse primers (Table S2) and 1 U of Phusion DNA Polymerase. After an initial denaturation step of 98 C /2 min, 35 cycles of denaturation/annealing/extension (98/61/72°C – 20/30/100 s) was employed, concluded by a final extension step at 72°C for 10 min.

### **FX-cloning and sub-cloning of RND transporters**

Initial cloning of target genes (Table S3, Table S4) was performed by FX-cloning into the cloning vector pINITcat. Digestion and ligation of PCR product insert (i) and vector (v) were done consecutively in the same tube using the following reaction conditions [1]: 50 ng of vector were mixed with 1:5 (v:i) molar ratio of insert (PCR product), 1x Tango buffer (Thermo Fisher) and 2.5 U *LguI* (SapI). Digestion was carried out for 2 h at 37°C, followed by inactivation of the enzyme at 65°C for 20 min. For ligation reaction, 10 mM ATP and 1 U T4 ligase were added to the mixture and incubated at 22°C for 1 h. After enzyme inactivation (20 min at 65°C), 10  $\mu$ L of the ligation mixture were employed to transform *E. coli* MC1061 chemically competent cells. Single colonies were selected for o/n cultures and plasmid isolation was done with QIAprep Spin Miniprep Kit (QIAGEN). For FX-subcloning of RND target genes into expression vectors, the same protocol was applied; in this case pINITcat-RND constructs were employed as inserts in a molar ratio 1:4 (vector:insert).

### **DNA quantification and sequencing**

Linear and plasmid DNA was quantified by UV-absorbance measurements at 260 nm using Nanodrop (Peqlab Biotechnologie GmbH). Cloning and expression constructs were sequenced by Eurofins Genomics and GATC Biotech companies.

## **Heterologous production screening of RND transporters in *E. coli***

One colony of freshly transformed *E. coli* cells (BL21 (DE3), C43 (DE3)  $\Delta$ *acrAB*, C41 (DE3)  $\Delta$ *acrAB* or MC1061) with membrane protein-green fluorescent protein (MP-GFP) expression constructs (Table S4, Table S5), was used to inoculate 1 mL LB supplemented with appropriate antibiotic, in 2 mL Eppendorf tube and incubated o/n at 37°C, 900 rpm in a thermomixer. Next day, o/n cultures were diluted 100x in 700  $\mu$ L fresh LB media in 96-deep well plate format. The plate was covered with gas permeable membrane (Adhesive film for cultures plates porous, breathable rayon film non-sterile, VWR) and incubated at 37°C in a plate shaker incubator at 900 rpm. OD<sub>600</sub> was monitored and when reached 0.5-0.6, cells were induced with IPTG (0.2-1.0 mM) or L-arabinose (0.0002-0.2% (w/v)). Cells were allowed to grow for 4 h at 25°C, in a plate shaker incubator at 900 rpm. After that, the 96-deep well plate was centrifuged at 4000 rpm (3046 g, rotor Microplate MP 3300) for 20 min to collect the cell pellets. Cells were resuspended in 200  $\mu$ L PBS buffer (137 mM NaCl, 2.7 mM KCl, 10 mM Na<sub>2</sub>HPO<sub>4</sub>, 2 mM KH<sub>2</sub>PO<sub>4</sub>, pH 7.4) and divided in two samples: 1. 100  $\mu$ L of cells from each well were transferred to a 96-black well plate (Brand plates PureGrade -S 781668) and whole cell fluorescence was measured in a TECAN Infinite M200 reader (Excitation wavelength 485 nm, emission wavelength 535 nm, gain 100). 2. The remaining 100  $\mu$ L of cells from each well were transferred to a 96-transparent well plate (Brand plates 781602) and OD<sub>600</sub> was measured in a TECAN Infinite M200 reader. Fluorescence was normalized to the OD<sub>600</sub> value [42]. Once a suitable *E. coli* strain and inducer concentration were found for a specific RND protein production, the conditions were replicated for post-induction time and temperature screening (Table S5). This time, o/n cultures of freshly transformed cells were diluted to 10 mL fresh LB in 50 mL falcon tubes and incubated at 37°C, 180 rpm. OD<sub>600</sub> was monitored and when reached 0.5-0.6, cells were induced with appropriate inducer (IPTG or L-arabinose) at the indicated concentrations. Cell growth was continued at 25°C and 37°C, normalized cell samples (1 mL of cells of OD<sub>600</sub>=1) were taken after 2, 4, 16 h, and centrifuged at 13000 rpm (12664 g, rotor Heraeus Sepatech 3743) for 5 min. Cells were resuspended in 200  $\mu$ L PBS buffer; whole cell fluorescence and OD<sub>600</sub> were measured as described above.

### **2.3 Production and purification of St\_AcrD**

*E. coli* C43 (DE3)  $\Delta$ *acrAB* cells were transformed with p7XC3H-*acrD* construct and employed to inoculate 100 mL TB medium supplemented with 50  $\mu$ g/mL kanamycin. Culture was incubated at 37°C, 180 rpm until OD<sub>600</sub> reached 1-1.3 and then diluted 100x in fresh medium. Cell growth was continued at 37°C and 150 rpm, monitoring OD<sub>600</sub> until 0.8-1.2 was obtained. At this point, cultures were cooled down at 4°C during 30 min and induced with 0.5 mM IPTG.

Cells were allowed to grow o/n at 25°C, 150 rpm. Next morning, cells were harvested by centrifugation 5500 rpm (6425 g, rotor FiberLite F8-6x1000y), for 15 min, 4°C and resuspended in lysis buffer (20 mM Tris-Cl, pH 7.5, 200 mM NaCl, 1 mM MgSO<sub>4</sub>, 0.5 mg/mL lysozyme, 100 µM Pefabloc SC and trace amounts of DNase I). Cells were lysed by passing 2 times through a Pressure Cell Homogenizer EP (Stansted) at 14-29 KPsi. Cell lysate was cleared by centrifugation (11730 rpm (20000 g, rotor FiberLite F14-6x250y), 30 min, 4°C) removing cell debris. To isolate the membrane fraction, the supernatant was centrifuged at 185000 g for 1 h, 4°C (40000 rpm, rotor Beckman Ti45). The membrane pellet was resuspended in membrane resuspension buffer (20 mM Tris-Cl, pH 7.5, 200 mM NaCl, 10 mM imidazole) employing a homogenizer (Potter-Elvehjem tube and PTFE pestle shearing). Membranes were aliquoted, frozen with liquid nitrogen and stored at -80°C. Thawed membrane was solubilized with 2% (w/v) DDM with mild agitation for 1 h at 4°C. Unsolubilized material was removed by centrifugation at 160000 g, 4°C for 45 min (40000 rpm, rotor Beckman Ti60). The supernatant was filtered through a 0.22 µm filter (Cellulose acetate, VWR), and loaded into His TRAP HP column (GE Healthcare) connected to a peristaltic pump. Flow-through was collected and column was washed with 20 mM Tris-Cl, pH 7.5, 0.04% (w/v) DDM buffers with increasing concentrations of imidazole (30, 60, 80 mM). Protein was eluted in 20 mM Tris-Cl pH, 7.5, 0.04% (w/v) DDM and 300 mM imidazole buffer and concentrated (Amicon Ultra 4, 100 kDa cutoff, Merck Millipore) before injection into Superose 6 15/300 increase column (GE Healthcare) coupled to and Äkta system and previously equilibrated in GF buffer (20 mM Tris-Cl, pH 7.5, 10 mM NaCl and 0.04% (w/v) DDM).

### Homology model building

The tertiary structure of St\_AcrD was predicted by homology modeling employing Phyre2 server[2]. As templates, high resolution L and T protomers of Ec\_AcrB structure solved at 1.9 Å (PDB: 4DX5) were selected. The program covered more than 99% of the sequences. The quality of the homology models of St\_AcrD in the L and T conformations, was validated by the servers PSVS [3] and SAVES v5.0 (<https://saves.mbi.ucla.edu>).

1. Geertsma, E.R.; Dutzler, R. A versatile and efficient high-throughput cloning tool for structural biology. *Biochemistry* **2011**, *50*, 3272-3278.
2. Kelley, L.A.; Mezulis, S.; Yates, C.M.; Wass, M.N.; Sternberg, M.J. The Phyre2 web portal for protein modeling, prediction and analysis. *Nat Protoc* **2015**, *10*, 845-858.
3. Bhattacharya, A.; Tejero, R.; Montelione, G.T. Evaluating protein structures determined by structural genomics consortia. *Proteins* **2007**, *66*, 778-795.
