# Supplementary material for: Characterization and Molecular Determinants for β-Lactam Specificity of the Multidrug Efflux Pump AcrD from Salmonella typhimurium
Source: MDPI journal article supplement (doi:10.3390/antibiotics10121494), 2021-12-06
Supplement: s1 [file s1]

**Table S1. Comparison of identities and similarities of RND multidrug transporters of *E. coli*, *C. jejuni* and *S. typhimurium*.** Identity and similarity percentage (%I and %S) were obtained from protein sequence alignments employing Protein Blast server (<https://blast.ncbi.nlm.nih.gov/Blast.cgi>). Closely related homologues are highlighted in green.

| RND transporter                      | <i>E. coli</i> |    |      |    |      |    |      |    |      |    |
|--------------------------------------|----------------|----|------|----|------|----|------|----|------|----|
|                                      | AcrB           |    | AcrD |    | AcrF |    | MdtB |    | MdtC |    |
|                                      | %I             | %S | %I   | %S | %I   | %S | %I   | %S | %I   | %S |
| <b><i>Campylobacter jejuni</i></b>   |                |    |      |    |      |    |      |    |      |    |
| Cj_CmeB                              | 42             | 63 | 43   | 63 | 42   | 61 | 28   | 48 | 30   | 51 |
| Cj_CmeF                              | 26             | 48 | 26   | 48 | 27   | 48 | 28   | 48 | 27   | 49 |
| <b><i>Salmonella typhimurium</i></b> |                |    |      |    |      |    |      |    |      |    |
| St_AcrB                              | 95             | 97 | 65   | 80 | 79   | 89 | 29   | 49 | 29   | 50 |
| St_AcrD                              | 66             | 80 | 94   | 97 | 63   | 77 | 29   | 50 | 29   | 49 |
| St_AcrF                              | 81             | 91 | 64   | 78 | 89   | 94 | 29   | 50 | 28   | 49 |
| St_MdsB                              | 41             | 64 | 40   | 62 | 42   | 63 | 30   | 51 | 31   | 50 |
| St_MdtB                              | 28             | 47 | 29   | 50 | 28   | 49 | 91   | 96 | 49   | 67 |
| St_MdtC                              | 28             | 49 | 28   | 49 | 29   | 50 | 49   | 67 | 92   | 96 |

**Table S2. Primers used for FX-cloning and site-directed mutagenesis**  
All primers were obtained from *Microsynth AG*.

**Primers used for FX-cloning**

| Primer     | Sequence (5' → 3')                      |
|------------|-----------------------------------------|
| Fw cmeB    | ATATATGCTCTTCTAGTTTTTCTAAATTTTTTATCGA   |
| Rev cmeB   | TATATAGCTCTTCATGCTTCATGAACCTTACCTCTTT   |
| Fw cmeF    | ATATATGCTCTTCTAGTTTTAAACTAGCTATAAACCG   |
| Rev cmeF   | TATATAGCTCTTCATGCATTTAATTTTTTCTCTCAT    |
| Fw acrB    | ATATATGCTCTTCTAGTCTTAATTTCTTATCGATCG    |
| Rev acrB   | TATATAGCTCTTCATGCGCGATGTTCTGTGGAATGAC   |
| Fw acrD    | ATATATGCTCTTCTAGTGGCAATTTTTTATCGATCG    |
| Rev acrD   | TATATAGCTCTTCATGCTTTCGGGCGCGCTCAGCG     |
| Fw acrF    | ATATATGCTCTTCTAGTGCAAATTTTTTATTAGACG    |
| Rev acrF   | TATATAGCTCTTCATGCATCATGATGGCGATTAAATC   |
| Fw mdsB    | ATATATGCTCTTCTAGTAAATTCACCCACTTTTTTCAT  |
| Rev mdsB   | TATATAGCTCTTCATGCTGCTTGCTGATCATGCGAAT   |
| Dfw1AcrD   | ATATATGCTCTTCTAGTGGCAATTTTTTATCGATCG    |
| Drev1 AcrD | TATATAGCTCTTCATGCATTATTAATGATGATGATGA   |
| Dfw 2AcrD  | ATATATGCTCTTCTAGTCACCATCATCATCACCATCATC |
| Drev2 AcrD | TATATAGCTCTTCATGCTTATTATTCGTGCCATTTCG   |

**Primers used for site-directed mutagenesis**

| Primer       | Sequence (5' → 3')                |
|--------------|-----------------------------------|
| N136A-Fw     | GCTATTTTGACCATCGCTTT              |
| N136A-Rev    | GGTATCGCCCCGTTTTCG                |
| T139A-Fw     | GCCATCGCTTTCGTCTCT                |
| T139A-Rev    | CAAAATATTGGTATCGCCCCG             |
| D176A-Fw     | GCCGCTTATGGTTCACAGT               |
| D176A-Rev    | AATATCGCCGACGCCCCG                |
| Y178A-Fw     | GCTGGTTCACAGTACTCTA               |
| Y178A-Rev    | AGCGTCAATATCGCCGA                 |
| S180A-Fw     | GCACAGTACTCTATGCGT                |
| S180A-Rev    | ACCATAAGCGTCAATATCG               |
| K274A-Fw     | CGTATGACTACCTCAGCCG               |
| K274A-Rev    | CTTCCGCCCCCAGCTC                  |
| D276A-Fw     | GCCTACCTCAGCGTTT                  |
| D276A-Rev    | ATACTTTTCCGCCCCA                  |
| Y277A-Fw     | GCCCTCAGCCGTTTAAACG               |
| Y277A-Rev    | GTCATACTTTTCCGCCCC                |
| Y327A-Fw     | GCTGAAACCACCTCCTTTG               |
| Y327A-Rev    | CGCGATCTTGTATTCCAGG               |
| F609A-Fw     | CCTCGACGGTAGGTTCCG                |
| F609A-Rev    | CGACCGACATAATGTTGTCTT             |
| S610A-Fw     | GCGACGGTAGGTTCCG                  |
| S610A-Rev    | GAAGACCGACATAATGTTGTCT            |
| T611A-Fw     | CGGTAGGTTCCGGCCCT                 |
| T611A-Rev    | CCGAGAAGACCGACATAATGT             |
| S614A-Fw     | GGCCCTGGCGGGAATG                  |
| S614A-Rev    | GGCACCTACCGTCGAGAAGA              |
| P616A-Fw     | GCTGGCGGGAATGGGCAA                |
| P616A-Rev    | GCCGGAACCTACCGTCG                 |
| F627A-Fw     | GCTGTTTCGCTTGAAAGACT              |
| F627A-Rev    | CATGCGCGGACGTTTT                  |
| R568A-Fw     | GCGGGCATGTTCACTACGT               |
| R568A-Rev    | ATCTTCCTGCGGCAGAAA                |
| R625A-Fw     | GCCATGTTTGTTCGCTTGA               |
| R625A-Rev    | CGCGACGTTTTGCCAT                  |
| G672A-Fw     | CTCTGGGCAGCTCCGCCG                |
| G672A-Rev    | CGCTAATTGCCGGCGGGC                |
| I27A-Fw      | GCTTCTCTTACCTGTTGAACA             |
| I27A-Rev     | GGCTAACGCCCCGTGCA                 |
| I337A-Fw     | GCTATCGATGTGGTCAAAA               |
| I337A-Rev    | CGAGGCTTTGACAAAAG                 |
| I338A-Fw     | GCCGATGTGGTCAAAAACGT              |
| I338A-Rev    | AATCGAGGCTTTGACAAAAG              |
| V341A-Fw     | GCCAAAACGTTGCTGGA                 |
| V341A-Rev    | CACATCGATAATCGAGGCT               |
| Fwmut Y178A  | GGCGATATTGACGCTGCTGGTTCACAGTACTCT |
| Revmut Y178A | AGAGTACTGTGAACCAGCAGCGTCAATATCGCC |

**Table S3. Multidrug RND transporters from *Campylobacter jejuni* and *Salmonella typhimurium*.** Number of amino acid residues and molecular weight of the proteins were calculated with ProtParam (<https://web.expasy.org/protparam/>). The KEGG identifier (<https://www.genome.jp/kegg/>) of each gene is given in brackets after the gene name.

| Gene                                 | Protein | Amino acid residues | Molecular weight (kDa) |
|--------------------------------------|---------|---------------------|------------------------|
| <b><i>Campylobacter jejuni</i></b>   |         |                     |                        |
| <i>cmeB</i> (Cj0366c)                | Cj_CmeB | 1040                | 113                    |
| <i>cmeF</i> (Cj1033)                 | Cj_CmeF | 1005                | 112                    |
| <b><i>Salmonella typhimurium</i></b> |         |                     |                        |
| <i>mdsB</i> (STM0351)                | St_MdsB | 1055                | 114                    |
| <i>acrB</i> (STM0475)                | St_AcrB | 1049                | 114                    |
| <i>mdtB</i> (STM2127)                | St_MdtB | 1040                | 112                    |
| <i>mdtC</i> (STM2128)                | St_MdtC | 1026                | 111                    |
| <i>acrD</i> (STM2481)                | St_AcrD | 1037                | 113                    |
| <i>acrF</i> (STM3391)                | St_AcrF | 1037                | 112                    |

**Table S4. Cloning and expression constructs of RND transporters produced by FX-cloning.** PCR products of the target genes were cloned initially in pINITcat and subsequently sub-cloned into the expression vectors p7XC3GH and pBXC3GH.

| Cloning constructs | Expression constructs       |              |
|--------------------|-----------------------------|--------------|
| pINITcat-cmeB      | p7XC3GH-cmeB<br>p7XC3H-cmeB | pBXC3GH-cmeB |
| pINITcat-cmeF      | p7XC3GH-cmeF                | pBXC3GH-cmeF |
| pINITcat-acrB      | p7XC3GH-acrB<br>p7XC3H-acrB | pBXC3GH-acrB |
| pINITcat-acrD      | p7XC3GH-acrD<br>p7XC3H-acrD | pBXC3GH-acrD |
| pINITcat-acrF      | p7XC3GH-acrF                | pBXC3GH-acrF |
| pINITcat-mdsB      | p7XC3GH-mdsB                | pBXC3GH-mdsB |

**Table S5. Summary of optimized conditions to produce RND-GFP fusion proteins in *E. coli*.**

| RND     | <i>E. coli</i> strain   | Inducer           | Time | Temp. | Medium |
|---------|-------------------------|-------------------|------|-------|--------|
| Cj_CmeB | C41(DE3) $\Delta$ acrAB | 0.5 mM IPTG       | 16 h | 25°C  | TB     |
| Cj_CmeF | MC1061                  | 0.02% L-arabinose |      |       |        |
| St_AcrB | C43(DE3) $\Delta$ acrAB | 0.5 mM IPTG       |      |       |        |
| St_AcrD | C43(DE3) $\Delta$ acrAB | 0.5 mM IPTG       |      |       |        |
| St_AcrF | C41(DE3) $\Delta$ acrAB | 0.5 mM IPTG       |      |       |        |
| St_MdsB | MC1061                  | 0.02% L-arabinose |      |       |        |
