# Supplementary material for: Characterization and Molecular Determinants for β-Lactam Specificity of the Multidrug Efflux Pump AcrD from Salmonella typhimurium
Source: MDPI journal article supplement (doi:10.3390/antibiotics10121494), 2021-12-06
Supplement: s1 [file s1]

**Characterization and molecular determinants for  $\beta$ -lactam  
specificity of the multidrug efflux pump AcrD from *Salmonella*  
*typhimurium***

**Jenifer Cuesta Bernal<sup>1</sup>, Jasmin El-Delik<sup>1</sup>, Stephan Göttig<sup>2</sup>, Klaas M. Pos<sup>1\*</sup>**

<sup>1</sup> Institute of Biochemistry, Goethe-University Frankfurt, Max-von-Laue-Str. 9, D-60438 Frankfurt am Main, Germany.

<sup>2</sup> Institute of Medical Microbiology and Infection Control, Hospital of the Goethe University, Paul-Ehrlich-Straße 40, D-60596 Frankfurt am Main, Germany.

\*Corresponding author

**Supplementary Figures**

a.

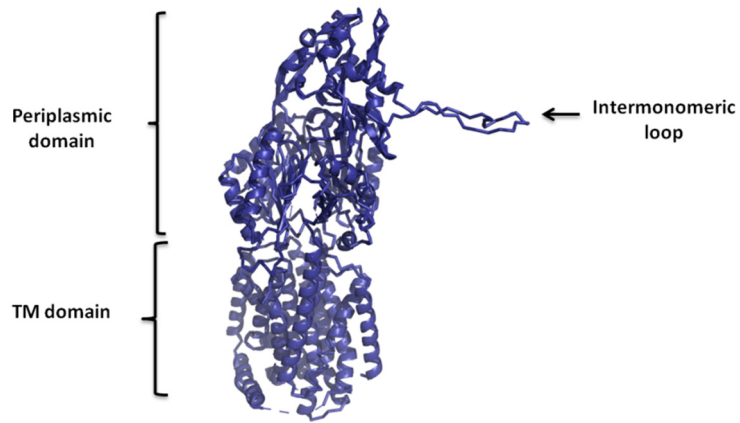

b.

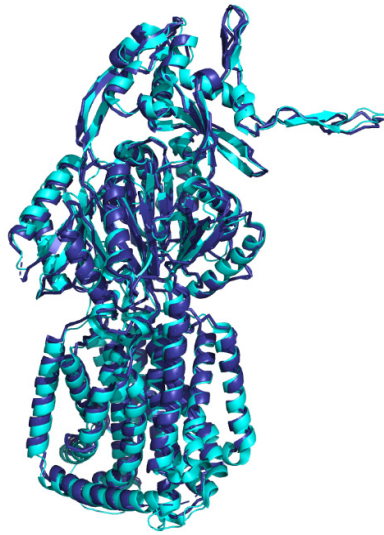

c.

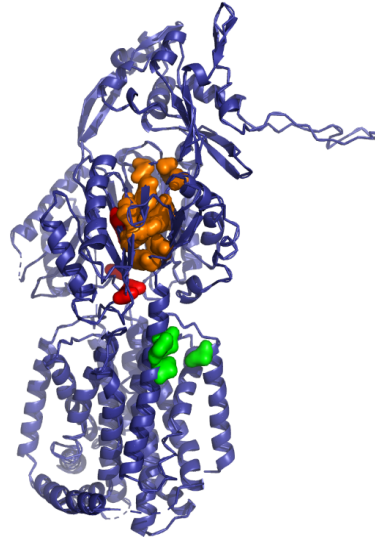

**Figure S1. Homology model of St\_AcrD.** a. *In silico* model of St\_AcrD was produced by Phyre2 server (<http://www.sbg.bio.ic.ac.uk/phyre2/>), monomer in T conformation (blue) is shown. b. Superimposition of St\_AcrD homology model to monomer in T conformation (turquoise) from Ec\_AcrB crystal structure (PDB:4DX5). c. Location of putative substrate binding pockets of St\_AcrD (sphere representation), access pocket (AP) in red; deep binding pocket (DBP) in orange, and the fusidic acid binding site in transmembrane helices 1 and 2 (TM1/TM2 region) in green. Figures were prepared with Pymol (<https://pymol.org/>).

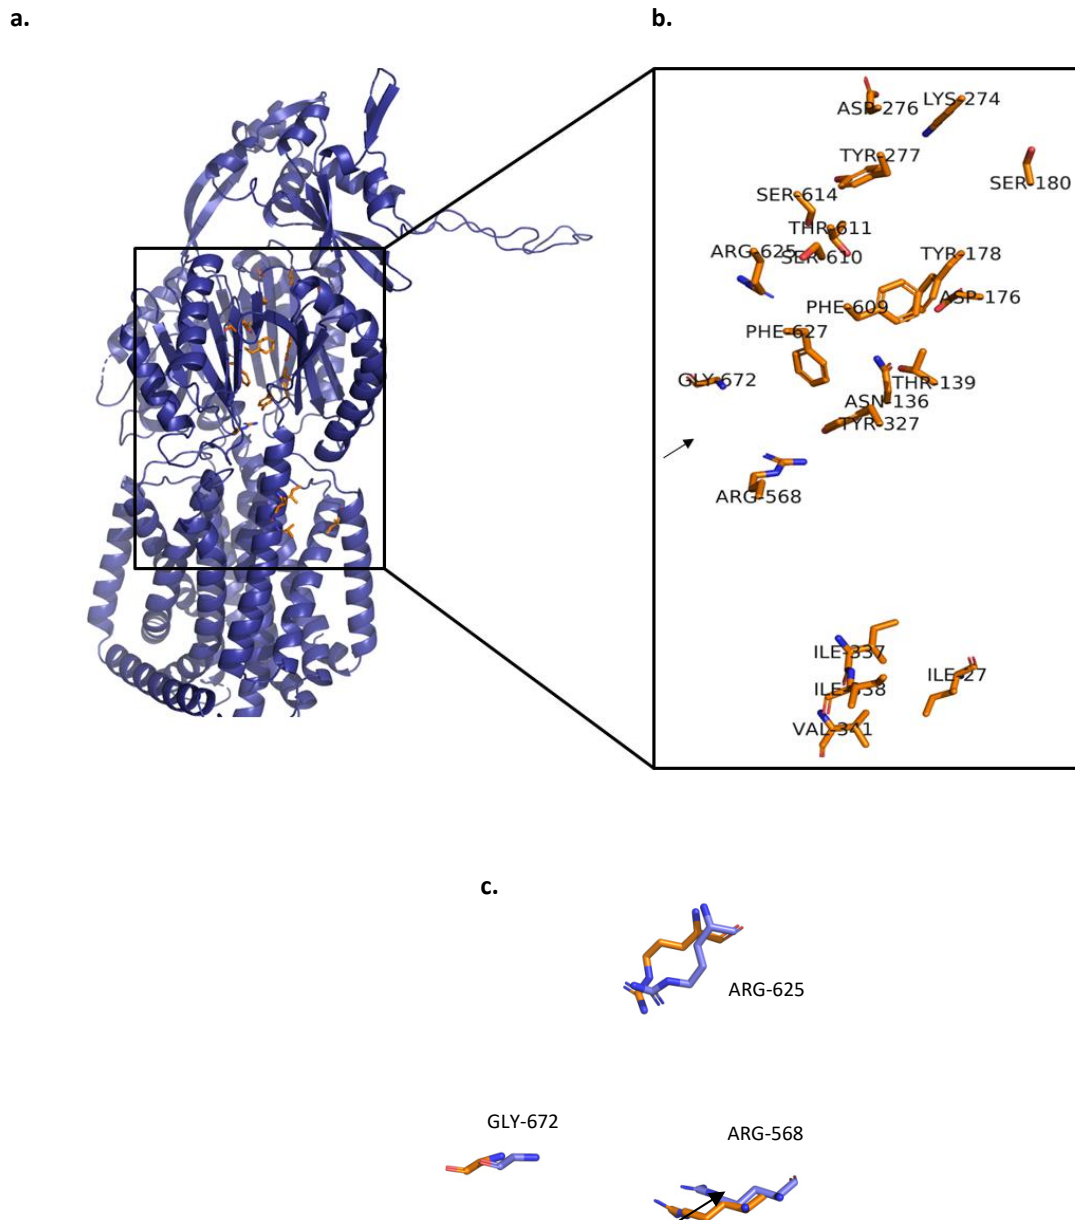

**Figure S2. Putative substrate translocation pathway in St\_AcrD and localization of the selected side chains for substitution.** **a.** Homology model of St\_AcrD in T conformation localizing putative residues (orange sticks) involved in substrate transport. **b.** Zoom in of target residues in the translocation pathway of St\_AcrD. The black arrow indicated the entrance to the DBP from the AP **c.** Residue orientation of R568, R625 and G672 in the access pocket indicated in L (blue) and T (orange) conformations, respectively.

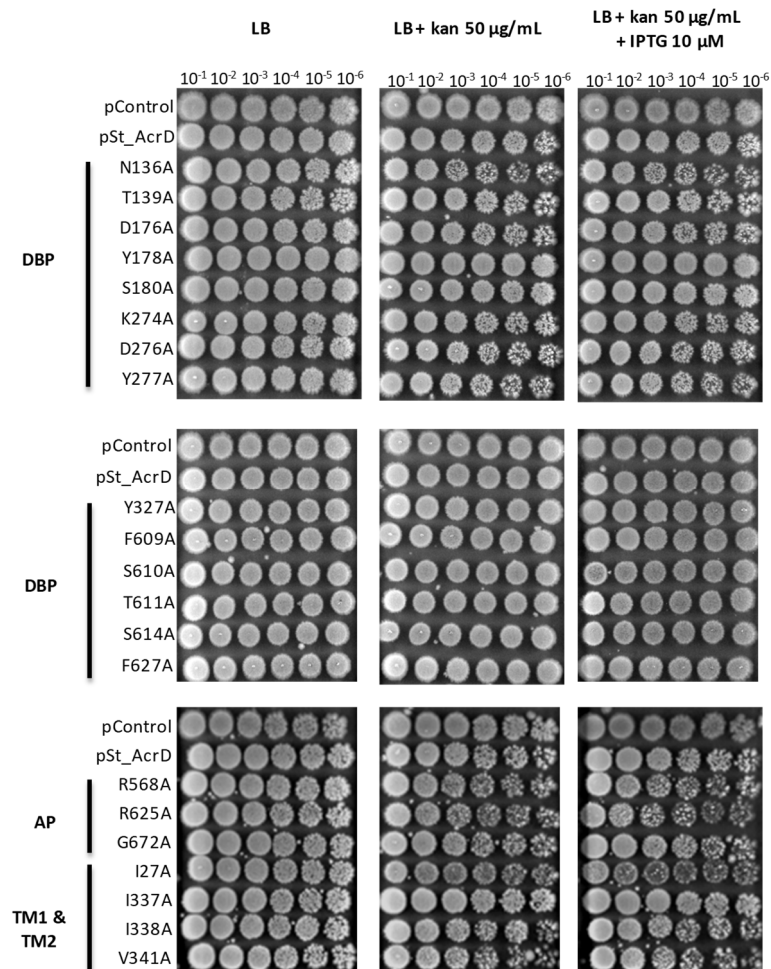

**Figure S3. Plate dilution assay with *E. coli* BW25113 (DE3)  $\Delta$ acrB $\Delta$ acrD harboring St\_AcrD WT or the indicated Ala-substitution variants.** Growth control of *E. coli* BW25113 (DE3)  $\Delta$ acrB $\Delta$ acrD cells harboring St\_AcrD wild type (pSt\_AcrD) or Ala-variants on LB agar plates, and LB agar plates supplemented with 50 µg/mL kanamycin (kan) and 10 µM IPTG. pControl: empty vector (negative control); DBP: deep binding pocket; AP: access pocket; TM1/TM2 region: fusidic acid binding site. The images were recorded with the ImageQuant LAS4000 Imager. Subsequently the raw images were prepared using ImageJ.

a.

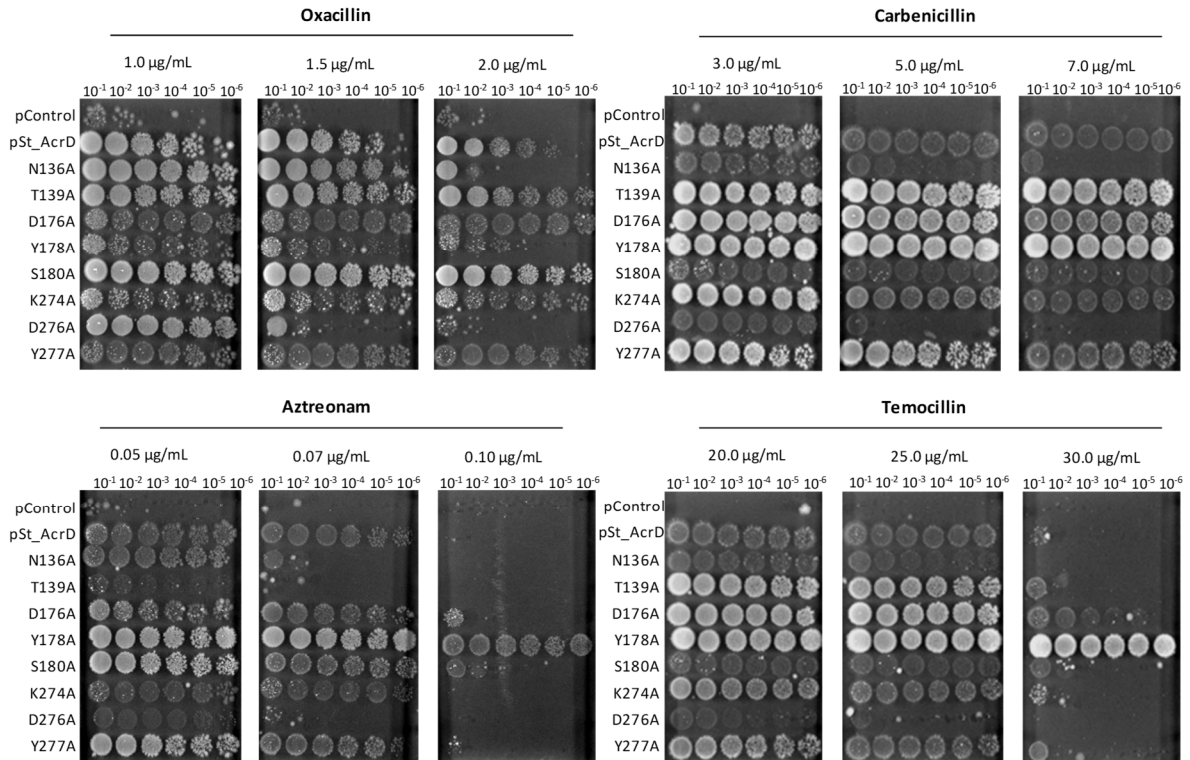

b.

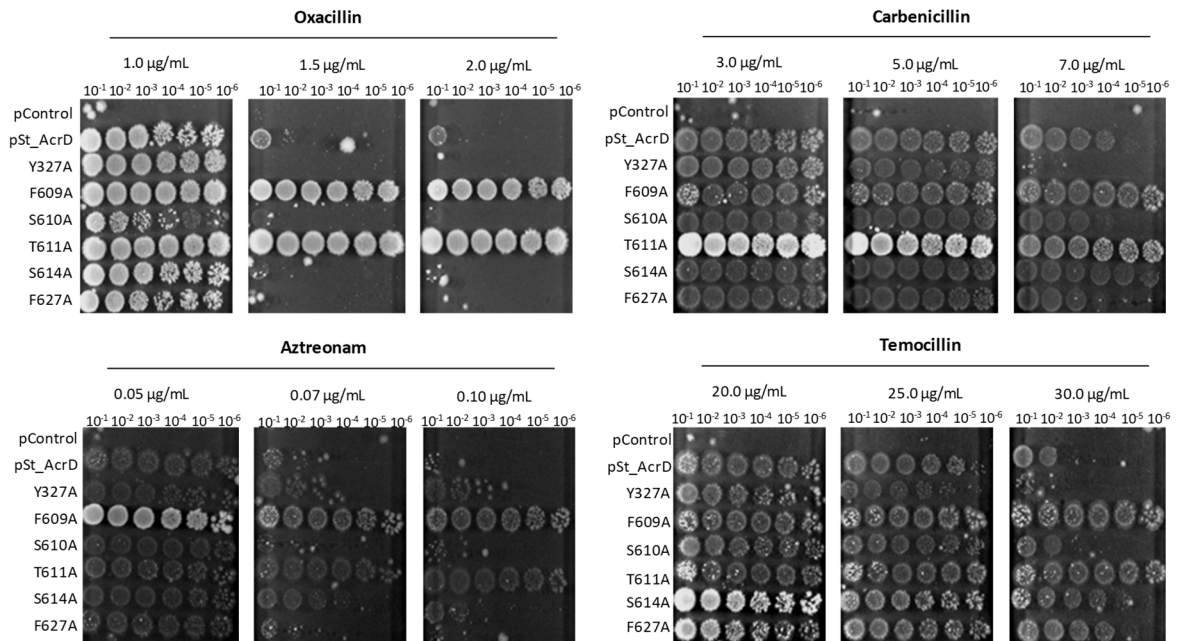

C.

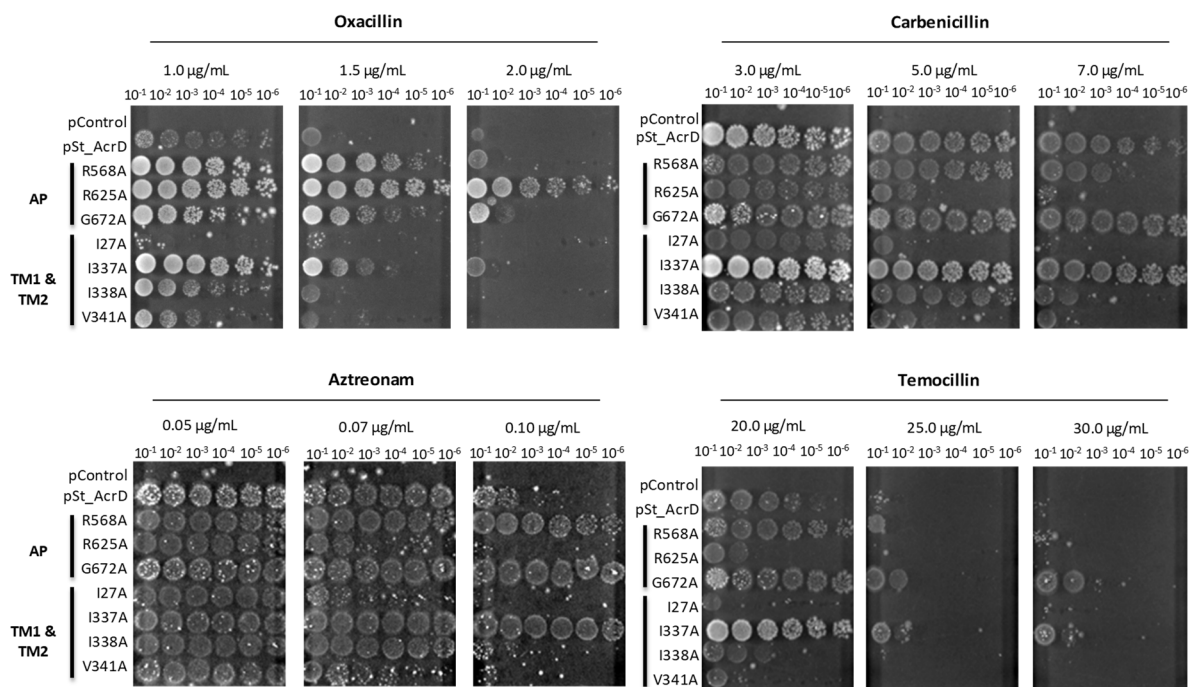

**Figure S4. Resistance profiles against  $\beta$ -lactams for *E. coli* BW25113 (DE3)  $\Delta$ acrB $\Delta$ acrD harboring St\_AcrD Ala-substitutions in the putative DBP, AP and in the TM1/TM2 region.** Plate dilution assay of *E. coli* BW25113 (DE3)  $\Delta$ acrB $\Delta$ acrD cells harboring St\_AcrD wild type (pSt\_AcrD) or deep binding pocket (DBP) Ala-variants from N136A to Y277A (a.), Y327A to F627A (b.) and (c.) Ala variant inside the access pocket (AP) and the TM1/TM2 region. All cells were grown on LB agar plates supplemented with 50 µg/mL kanamycin, 10 µM IPTG and the indicated antibiotic. pControl: empty vector (negative control). The images were recorded with the ImageQuant LAS4000 Imager. Subsequently the raw images were prepared using ImageJ.

**a.**

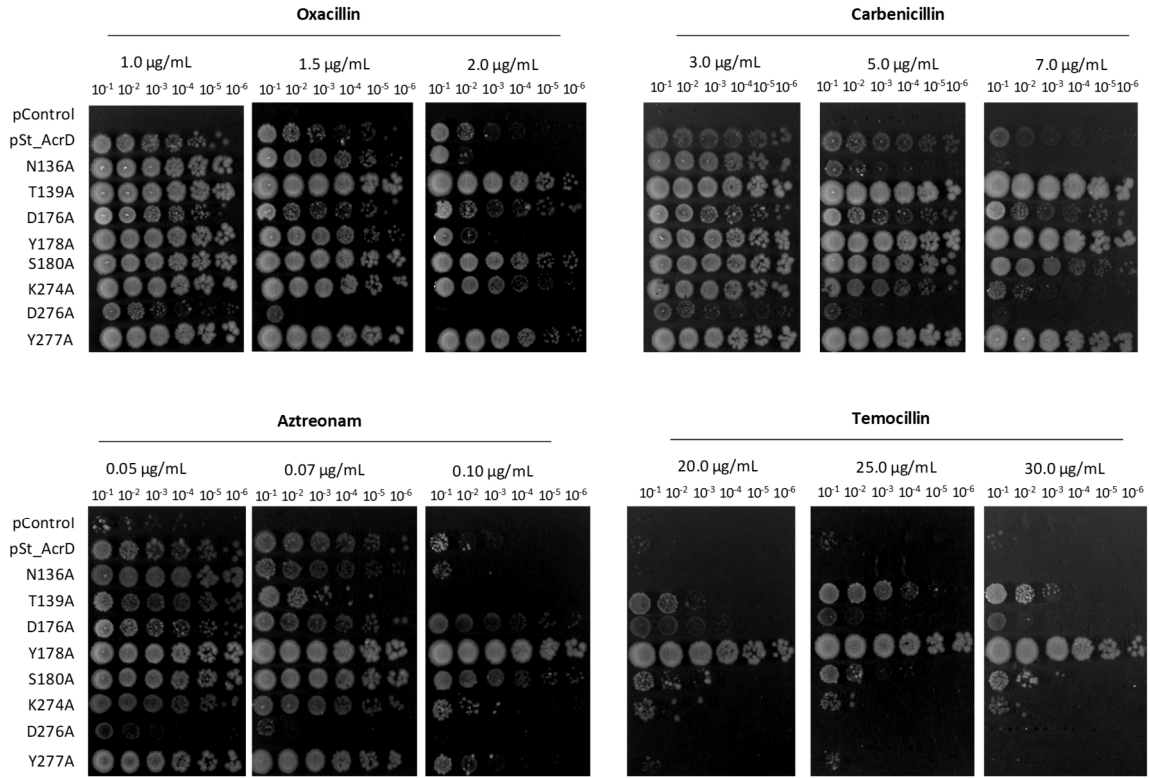

**b.**

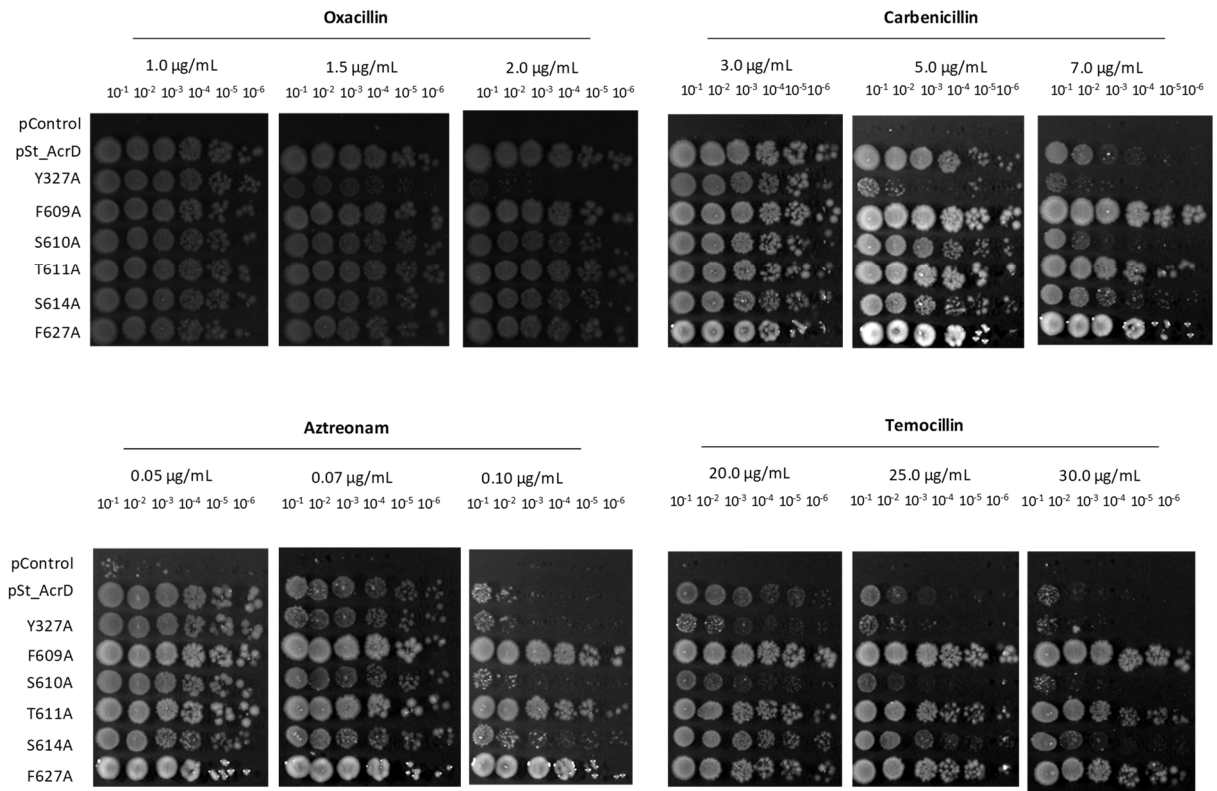

C.

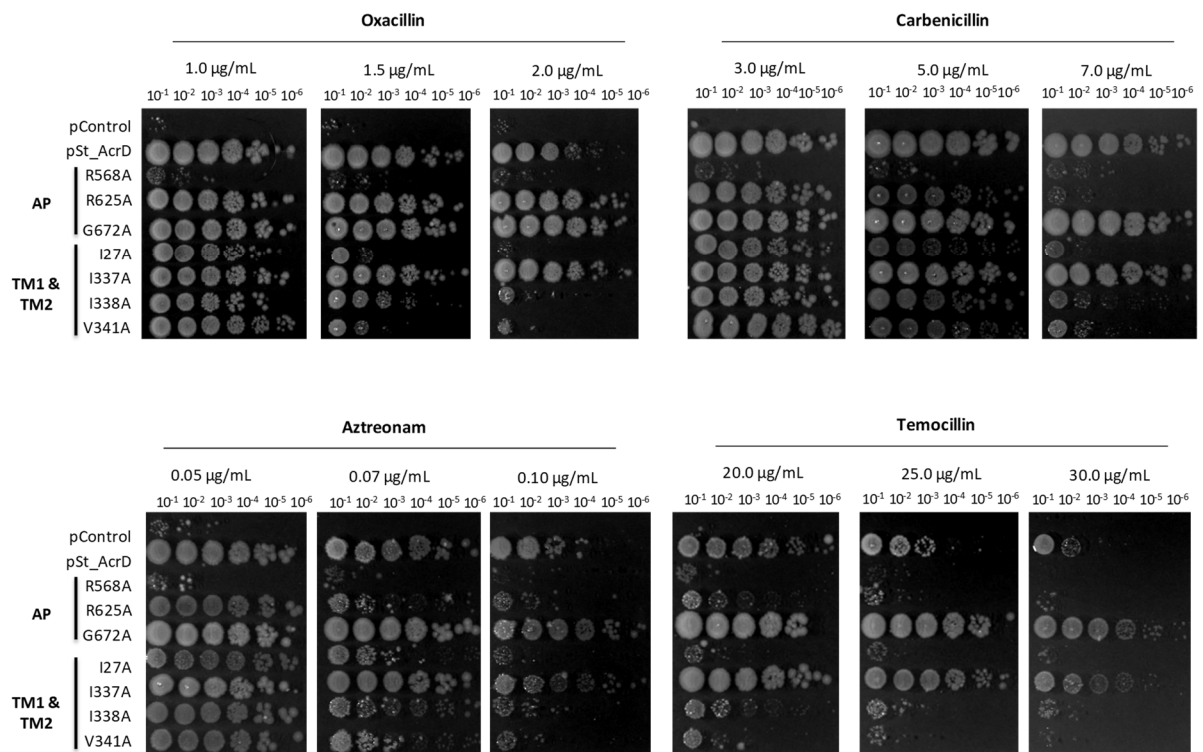

**Figure S5. Resistance profiles against  $\beta$ -lactams for *E. coli* BW25113 (DE3)  $\Delta$ acrB $\Delta$ acrD harboring *St\_AcrD* Ala-substitutions in the putative DBP (a. and b.) and AP and in TM1/TM2 region (c.).** Plate dilution assay of *E. coli* BW25113 (DE3)  $\Delta$ acrB $\Delta$ acrD cells harboring *St\_AcrD* wild type (pSt\_AcrD) or Ala-variants. All cells were grown on LB agar plates supplemented with 10  $\mu$ M IPTG and the indicated antibiotic. pControl empty vector (negative control); AP: access pocket; TM1/TM2 region: fusidic acid binding site. The images were recorded with the ImageQuant LAS4000 Imager. In the experiment shown here the LB agar plates did not contain kanamycin as additional selective (in contrast to the experiments shown in Figure S4).



a.

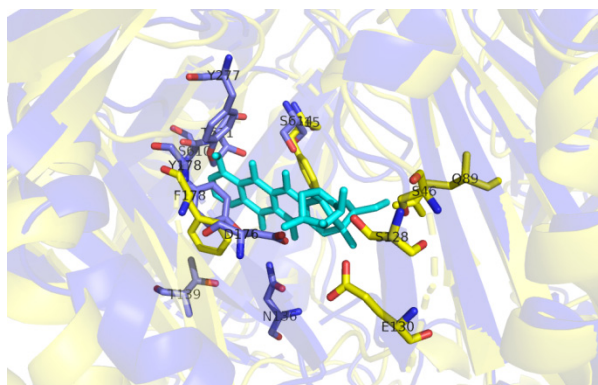

b.

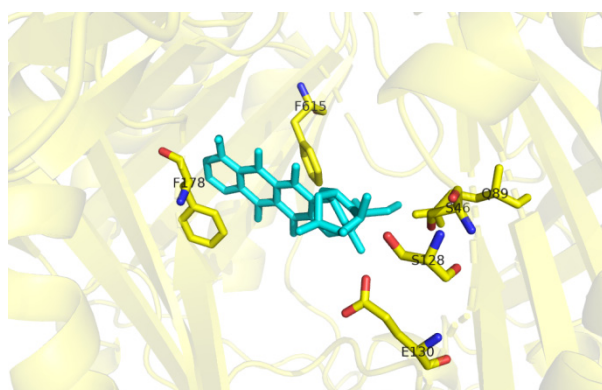

c.

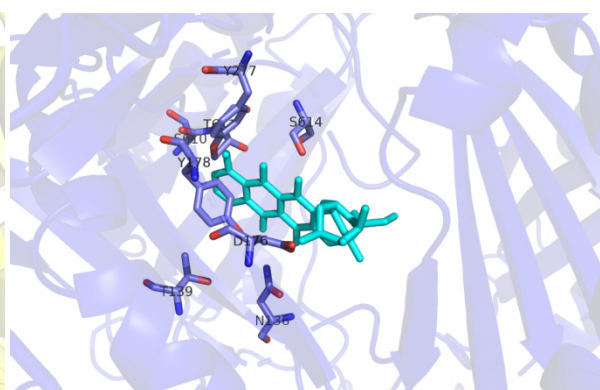

**Figure S6. Comparison of DBP of Ec\_AcrB (PDB: 4DX7) and St\_AcrD (homology model).** a. DBP superimposition of Ec\_AcrB (yellow) and St\_AcrD (blue) in the T conformation in the presence of doxorubicin (cyan). b. Ec\_AcrB residues in the DBP involved in doxorubicin interaction. c. St\_AcrD residues in the DBP provide a polar environment.

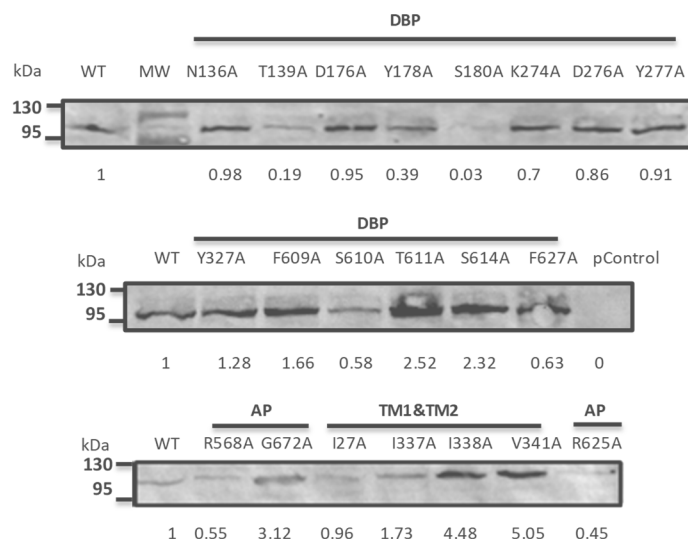

**Figure S7. Production of St\_AcrD WT and Ala-variants in *E. coli* BW25113 (DE3)  $\Delta$ acrB $\Delta$ acrD.** Anti-His Western blot analysis of whole cells harboring pControl (empty vector), St\_AcrD WT or Ala-mutants with substitutions in the DBP, AP and TM1/TM2 region. Cells were resuspended from positive control LB agar plates supplemented with 50  $\mu$ g/mL kanamycin and 10  $\mu$ M IPTG. Samples were normalized to OD<sub>600</sub> = 1 and 30  $\mu$ L were loaded in each well of 10% SDS-PAA gels. Molecular weight marker (MW) = PageRuler Prestained Protein Ladder. The images were recorded with the ImageQuant LAS4000 Imager. Band intensity was quantified using the software ImageJ, and normalized to the wild-type St\_AcrD (signal = 1) for every individual nitrocellulose membrane. Intensity numbers of the signal (bands) from the substitution variants is reported as a fraction from the St\_AcrD WT signal. Brightness of the image shown here was increased by 30% compared to the original image.

■ CmeB ■ CmeF ■ AcrB ■ AcrD ■ AcrF ■ MdsB

a.

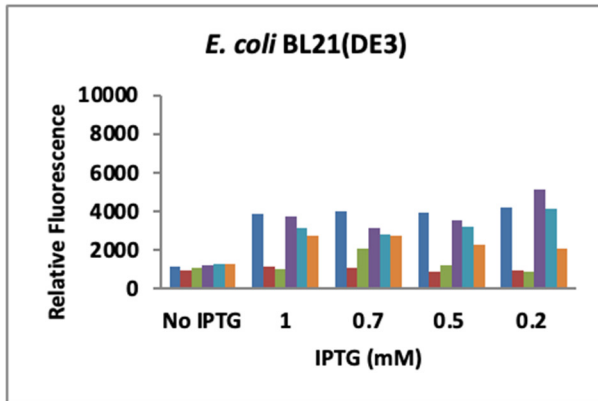

b.

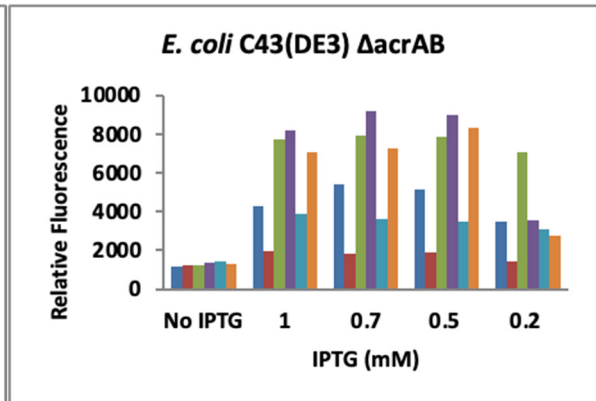

c.

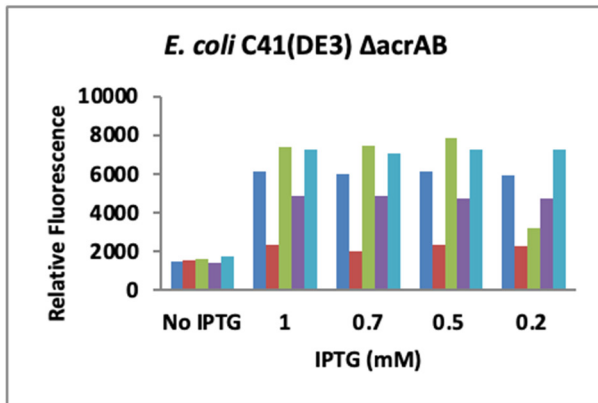

d.

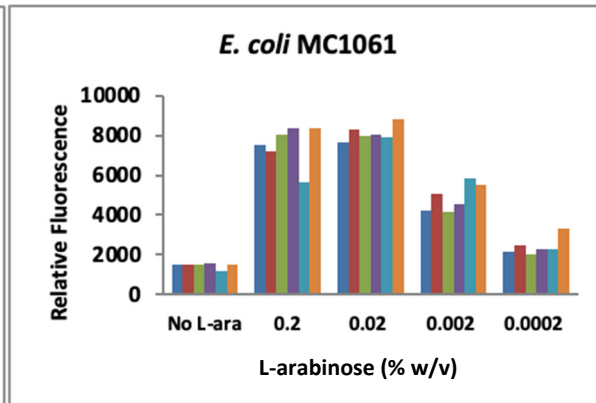

**Figure S8. *E. coli* strains and inducer concentration screening to produce RND-GFP fusion proteins.** a. *E. coli* BL21(DE3) b. *E. coli* C43(DE3) $\Delta$ acrAB c. *E. coli* C41(DE3) $\Delta$ acrAB and d. *E. coli* MC1061. Cells in experiments a. b. and c. were transformed with the p7XC3GH constructs and induced with IPTG. Cells in experiment d. were transformed with the pBXC3GH constructs and induced with L-arabinose. Whole-cell fluorescence measurements were done after 4 h post-induction and shown as Relative Fluorescence (Fluorescence arbitrary units/ $OD_{600}$ ).

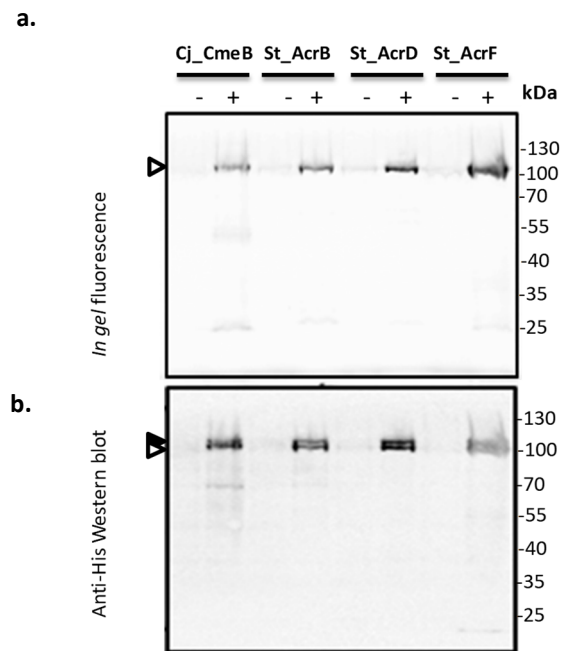

**Figure S9. *In gel fluorescence* and anti-His Western blot detection of RND-GFP fusion proteins produced in *E. coli*.** Whole cells expressing the fusion proteins according to the combinations described in Table S4, were collected and their cell density normalized to  $OD_{600} = 1$ . 10  $\mu$ L of induced (+) and non-induced (-) samples were subjected to SDS-PAGE analysis using 10% polyacrylamide gels. **a.** *In gel fluorescence* and **b.** anti-His Western blot analysis were performed on the same gel. Arrows indicate the fluorescent and therefore correctly folded species (white) and misfolded protein (black). Molecular weight marker (MW)= PageRuler Prestained Protein Ladder (Thermo Scientific). The figures were produced using the ImageQuant LAS4000 Imager (excitation: 460 nm, emission: 510 nm).

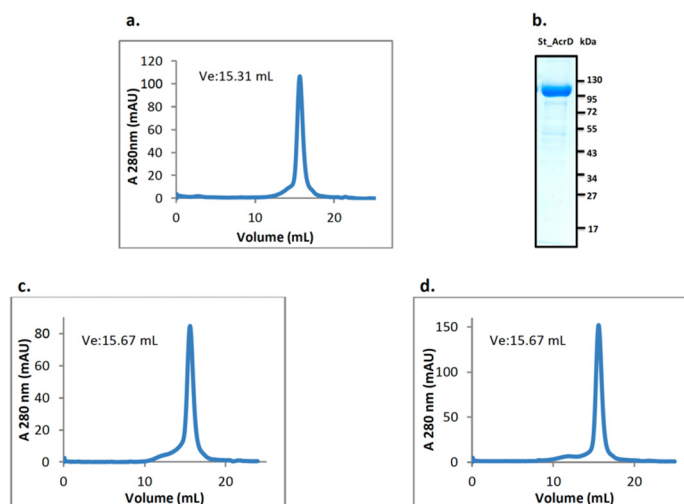

**Figure S10. Purification of St\_AcrD.** SEC profiles of freshly purified protein (a.) and upon storage at 4°C and 17°C for one week (c. and d., respectively). Protein (0.30-0.35 mg) was applied to a Superose 6 15/300 increase column equilibrated in 20 mM Tris-Cl, pH 7.5, 150 mM NaCl, 0.04 % w/v DDM buffer with a flow rate of 0.6 mL/min. Ve=elution volume. b. Coomassie-stained 10% SDS-PAA gel of purified St\_AcrD (13 µg). Molecular weight marker (kDa)= PageRuler Prestained Protein Ladder (ThermoScientific).

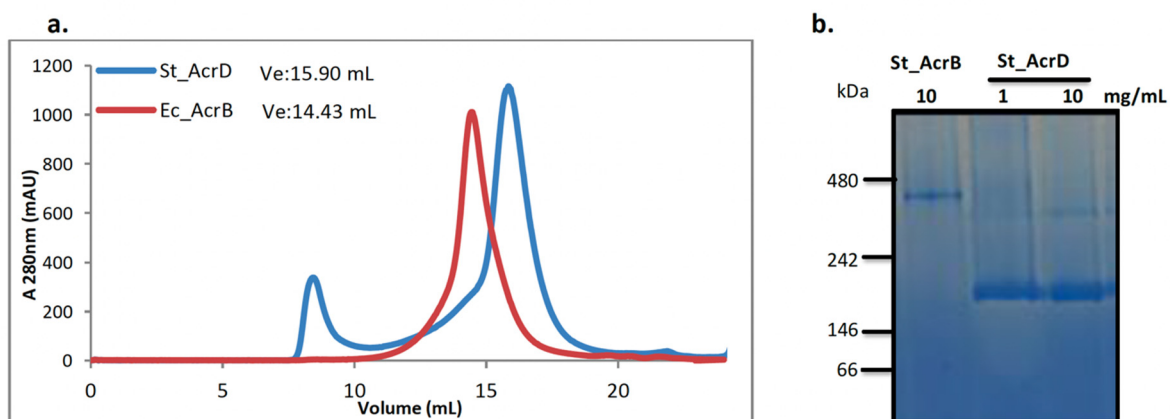

**Figure S11. Oligomeric state of St\_AcrD.** a. SEC profiles of purified St\_AcrD and Ec\_AcrB (4 mg). Superose 6 15/300 increase column was equilibrated in 20 mM Tris-Cl, pH 7.5, 150 mM NaCl, 0.04 % w/v DDM buffer with a flow rate of 0.6 mL/min. Ve=elution volume. b. Purified St\_AcrB (5 µg) and St\_AcrD (10 µg) were loaded on 3-12% BisTris Blue NativePAGE gels (ThermoFisher). Molecular weight marker = NativeMark Unstained Protein Ladder (ThermoFisher).
